# Supplementary material
Source: MDPI journal article supplement (https://www.mdpi.com/1424-2818/11/5/67)
Supplement: s1 [file s1]

## Supplementary material 1

**Figure S1** Colour morphs of *A. polyacanthus* among latitudes and distance strata (ie inner, mid and outer shelf). Lines indicate where a colour morph was found at more than once distance across the shelf. Where there are two fish at a latitude the line refers to the second fish colour morph on the right. Planes et al. [29] identified similar colour morphs and fish from the Capricorn Bunker Group and the Swains, these were placed in a different clade (Clade 3) to those from Lizard island to the Whitsundays (Clade 2), [29].

Inner

Mid

Outer

Lizard Is

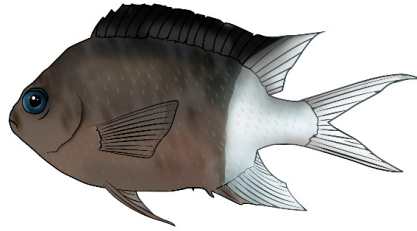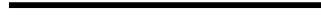

Townsville

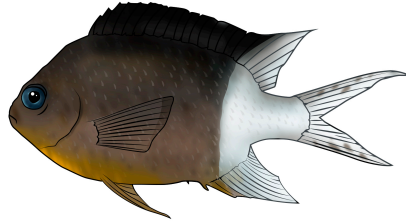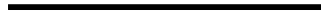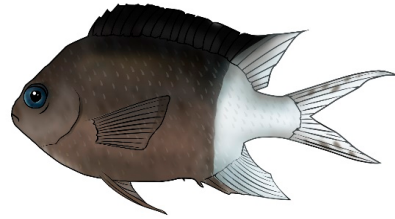

Whitsundays

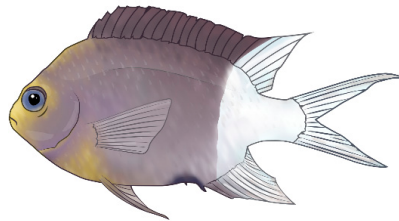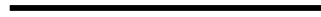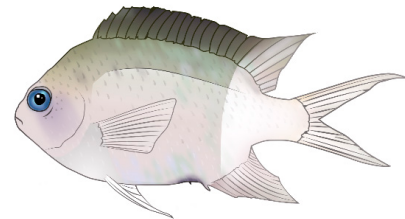

Swains

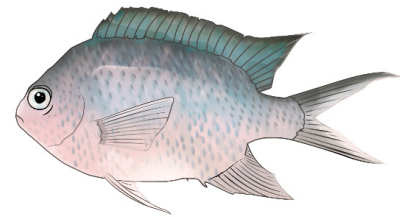

Capricorn

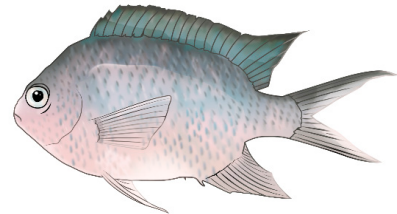

**Figure S2** Temperature data collected from loggers in shallow (10 m) and deep (30 m) water at offshore three latitudes (Lizard–Yonge Reef; Townsville–Myrmidon Reef, Capricorn Bunker, One Tree Island) that encompassed the latitudinal range of the study. The x-axis is presented in two month increments for the years 2007–2009.

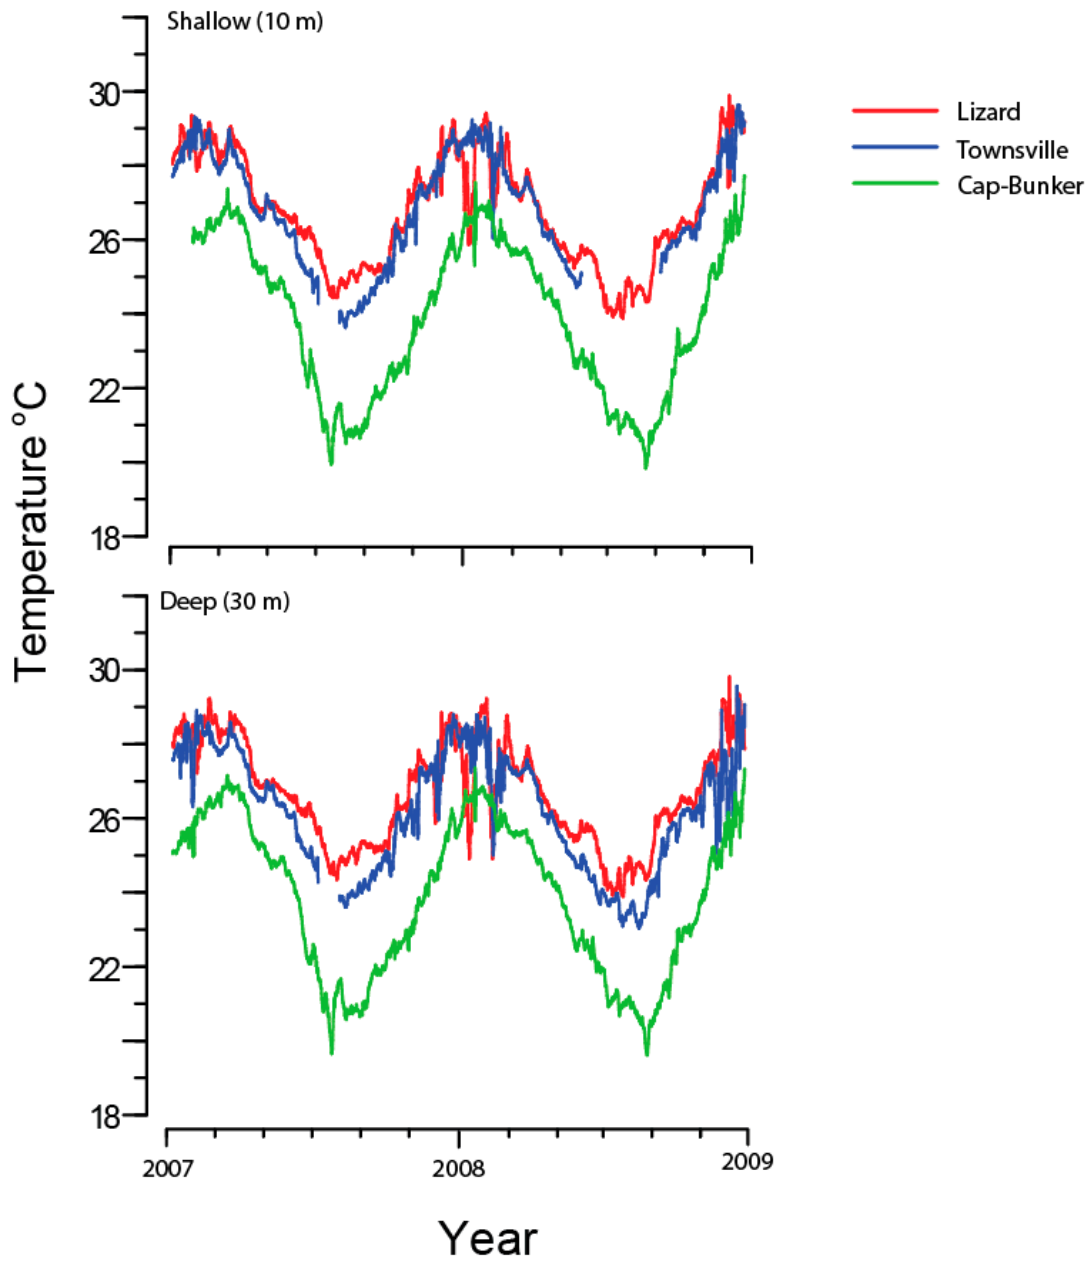

**Table SP 1.** Analysis 3, a partially hierarchical ANOVA, testing for differences among Distance strata and Zone (MPA and fished) n = 4 fish; dependent variable Standard Length top 10% (SLMAX10%) and Age top 10% (AMAX10%); \* p < 0.05; \*\*\* p < 0.001. Locations (ie where MPA and fished reefs were in close proximity) were sampled within each combination of zone and distance C = Cochran's Test for homogeneity of the data, k = 18, df = 3.

|                     |    | <b>SL 10%</b><br><b>C= 0.21 ns</b> |         | <b>Age 10%</b><br><b>C=0.14, ns</b> |       |
|---------------------|----|------------------------------------|---------|-------------------------------------|-------|
| Source of Variation | df | MS                                 | F       | MS                                  | F     |
| Distance            | 1  | 760.5                              | 0.7     | 0.03                                | 0.03  |
| Zone                | 1  | 312.5                              | 0.3     | 5.3                                 | 5.8   |
| D*Z                 | 1  | 66.1                               | 0.06    | 47.5                                | 52.5* |
| Loc(Dist.)          | 2  | 1089                               | 6.33    | 0.9                                 | 1     |
| Loc(Dist.)*Zone     | 2  | 172.1                              | 39.1*** | 0.9                                 | 1     |
| Residual            | 24 | 4.4                                |         | 0.9                                 |       |

**Table SP 2** Reef status comparison of age and growth parameters between Protected zones (Marine National Park Zone –Green = unfished MPA) with General Use Zone (Blue–fished).

|                 |       | <b>n</b> | <b>L<sub>inf</sub></b> | <b>K</b> | <b>To</b> | <b>r<sup>2</sup></b> | <b>AMax</b> | <b>Time Green (Years)</b> |
|-----------------|-------|----------|------------------------|----------|-----------|----------------------|-------------|---------------------------|
| Havannah        | Inner | 82       | 79.98                  | 1.39     | -0.05     | 0.37                 | 10          |                           |
| Pandora         | Inner | 43       | 77.43                  | 1.39     | -0.05     | 0.66                 | 9           | 14                        |
| Myrmidon        | Outer | 81       | 103.29                 | 1.27     | -0.04     | 0.53                 | 11          |                           |
| Barnett Patches | Outer | 113      | 100.073                | 1.17     | -0.04     | 0.71                 | 11          | 14                        |
| Lamont          | Outer | 73       | 92.52                  | 1.36     | -0.04     | 0.61                 | 6           |                           |
| One Tree Island | Outer | 81       | 77.13                  | 1.46     | -0.05     | 0.60                 | 6           | 20                        |
| Martin          | Inner | 160      | 88.49                  | 1.37     | -0.04     | 0.63                 | 7           |                           |
| Eagle           | Inner | 92       | 90.18                  | 1.25     | -0.05     | 0.63                 | 8           | 9                         |

**Table 3.** Mean size of *A. polyacanthus* at ages 2 and 3 collected from different distances across the shelf and latitude strata on the GBR, Australia.

| Location      | Shelf<br>Position | LAT<br>(°S) | <i>n</i> | Mean<br>size at 2<br>(SE) | <i>n</i> | Mean size<br>at 3 (SE) |
|---------------|-------------------|-------------|----------|---------------------------|----------|------------------------|
| Lizard Island | Inner             | 14°         | 110      | 83 (0.55)                 | 50       | 86 (0.78)              |
|               | Mid               | 14°         | 63       | 90 (0.83)                 | 67       | 93 (0.74)              |
|               | Outer             | 14°         | 82       | 88 (0.74)                 | 50       | 92 (0.54)              |
| Townsville    | Inner             | 18°         | 16       | 71 (2.68)                 | 26       | 79 (1.04)              |
|               | Mid               | 18°         | 20       | 86 (2.14)                 | 57       | 97 (1.26)              |
|               | Outer             | 18°         | 66       | 93 (1.11)                 | 51       | 100 (0.72)             |
| Whitsundays   | Inner             | 19°         | 41       | 75 (1.08)                 | 23       | 81 (1.39)              |
|               | Mid               | 19°         | 40       | 80 (1.16)                 | 11       | 78 (2.79)              |
|               | Outer             | 19°         | 38       | 87 (0.71)                 | 31       | 90 (0.86)              |
| Swains        | Outer             | 22°         | 67       | 89 (0.60)                 | 37       | 91 (0.83)              |
| Cap/ Bunker   | Outer             | 23°         | 52       | 78 (0.85)                 | 36       | 83 (1.30)              |

**Table SP 4** Three factor ANOVA, Factors, distance and latitude with the response variable SL for fish aged 2 and 3 (Analysis 5). Reefs within distances at each latitude were pooled for this analysis. The data were checked for homogeneity with Cochran's C, k = 9 and df = 19; Age 2 C = 0.17 NS; Age 3 C = 0.23 \*.

| Source of Variation | df  | SL at age 2<br>C= 0.17 ns |          | SL at age 3<br>C=0.23, * |         |
|---------------------|-----|---------------------------|----------|--------------------------|---------|
|                     |     | MS                        | F        | MS                       | F       |
| Distance            | 2   | 1497                      | 27.3***  | 1393                     | 31.1*** |
| Latitude            | 2   | 789.6                     | 14.4***  | 262.8                    | 5.9**   |
| D*L                 | 4   | 318.5                     | 318.5*** | 192.7                    | 4.3*    |
| Residual            | 171 | 4.4                       |          | 44.8                     |         |
